# Supplementary material for: FolR1: a novel cell surface marker for isolating midbrain dopamine neural progenitors and nascent dopamine neurons
Source: PubMed Central journal article supplement (PMC5007511; doi:10.1038/srep32488), 2016-09-01
Supplement: srep32488-s1.pdf [file srep32488-s1.pdf]

# **FoIR1: a novel cell surface marker for isolating midbrain dopamine neural progenitors and nascent dopamine neurons**

Nicole Gennet, Claudia Tamburini, Xinsheng Nan and Meng Li<sup>#</sup>

Neuroscience and Mental Health Research Institute, School of Medicine and school of Bioscience, Cardiff University, Cardiff, CF24, 4HQ, UK

<sup>#</sup>Corresponding Author: [lim26@cf.ac.uk](mailto:lim26@cf.ac.uk).

*Running title:* Purification of dopamine progenitors by FoIR1

keywords: midbrain dopamine neurons, stem cells, surface marker, enrichment, cell sorting

## Supplemental information

FolR1: a novel cell surface marker for isolating committed midbrain dopamine neural progenitors and nascent dopamine neurons

Gennet *et al.*,

FigS1

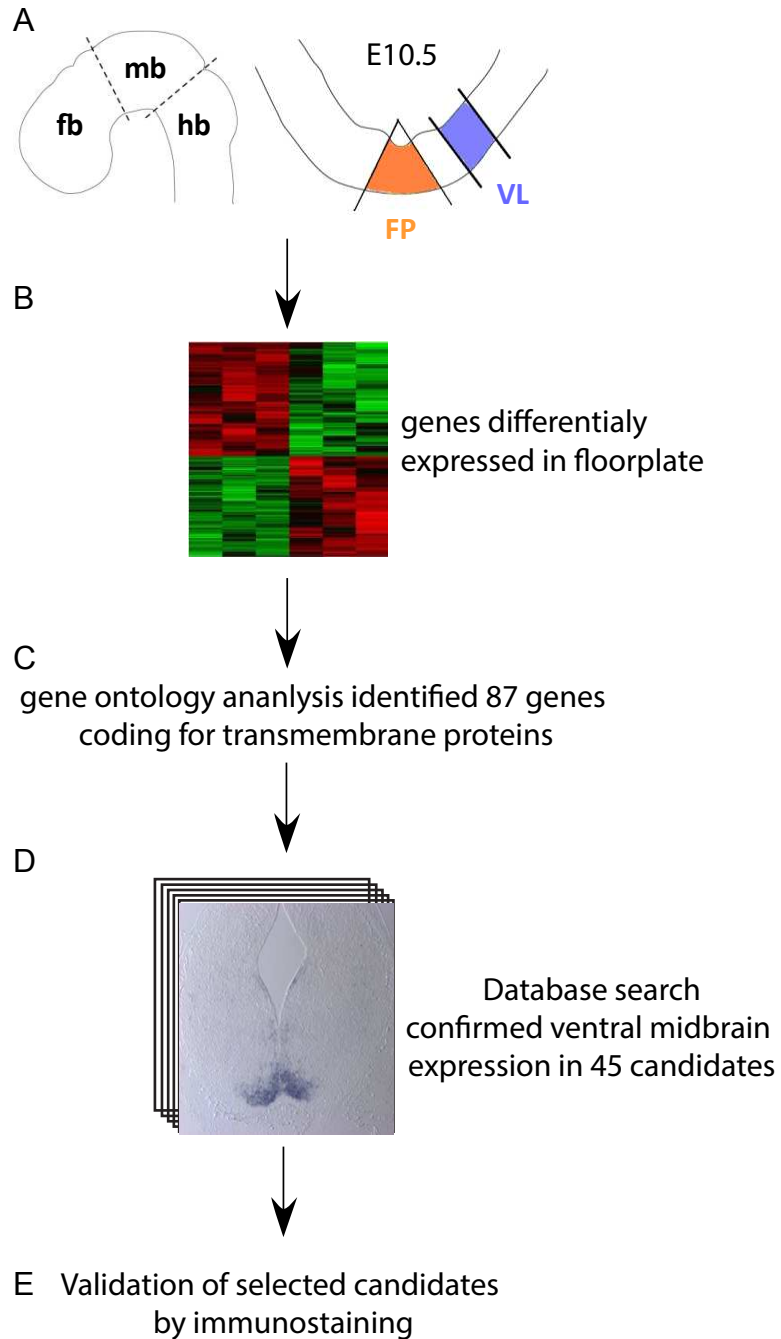

Gennet et al., Fig S2

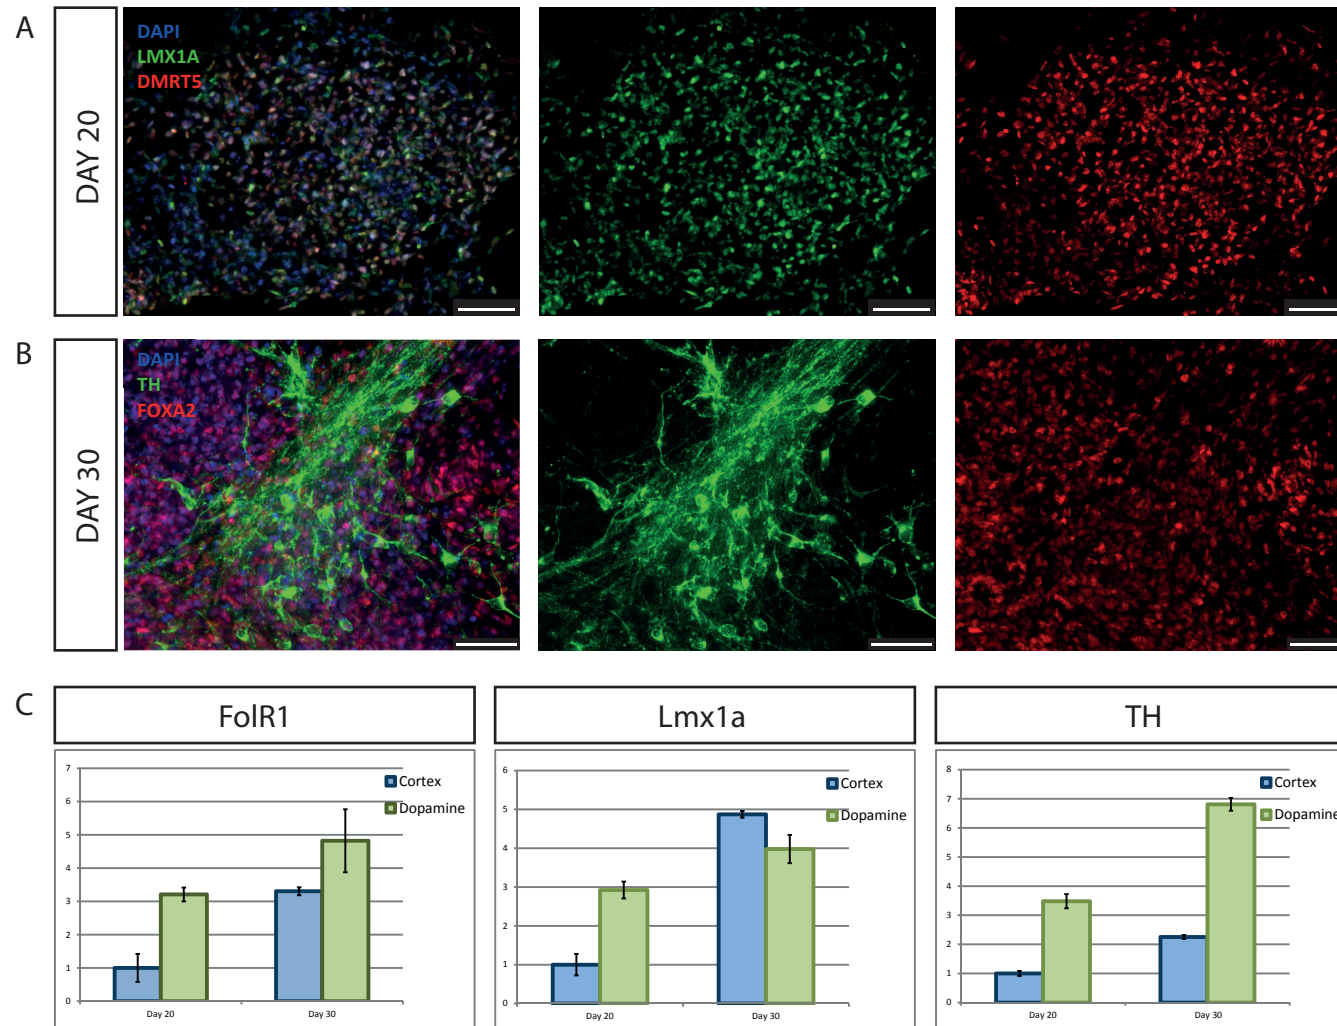

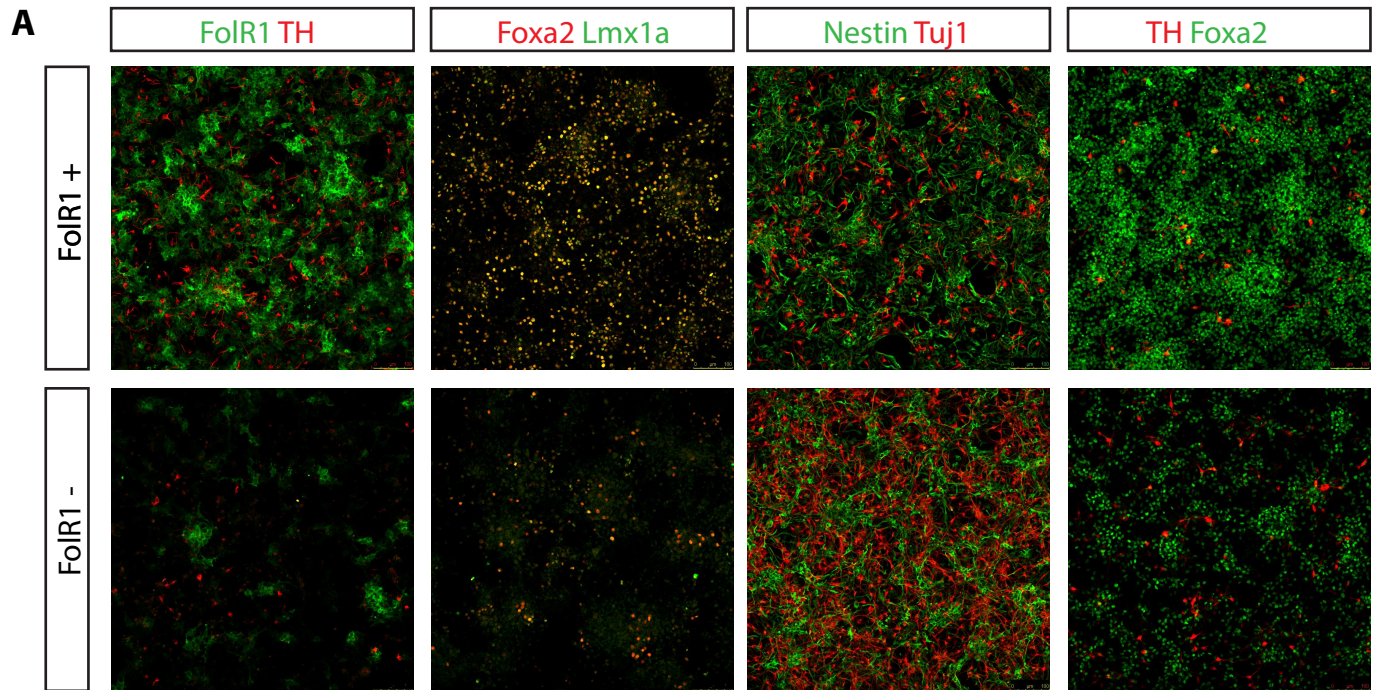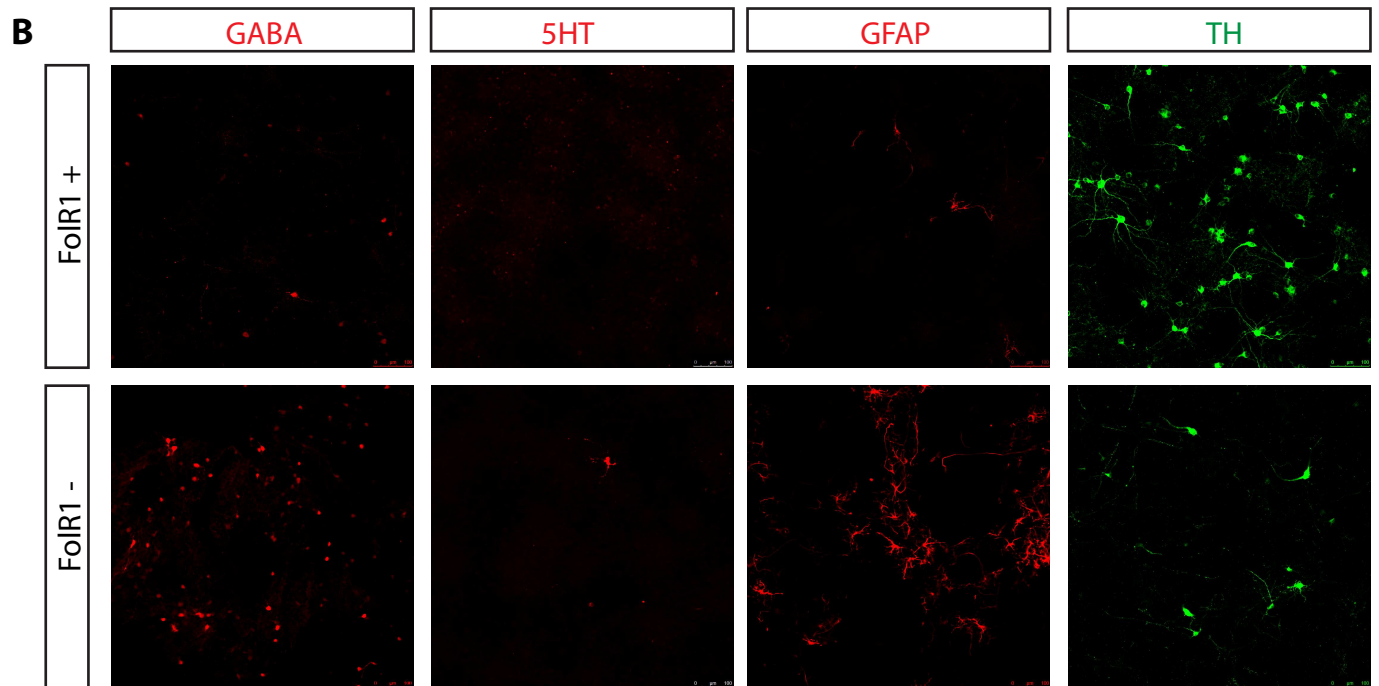

Table S1, Membrane coding genes preferentially expressed in the floor plate of mouse E10.5 midbrain

| Probe Set ID | Entrez Gene         | Gene Symbol                                     |
|--------------|---------------------|-------------------------------------------------|
| 1419393_at   | 27409               | Abcg5                                           |
| 1425102_a_at | 70008               | Ace2                                            |
| 1425103_at   | 70008               | Ace2                                            |
| 1450658_at   | 100048332 /// 23794 | Adamts5 /// LOC100048332                        |
| 1429022_at   | 11517               | Adcyap1r1                                       |
| 1426300_at   | 11658               | <b>Alcam</b>                                    |
| 1448213_at   | 16952               | <b>Anxa1</b>                                    |
| 1419091_a_at | 12306               | <b>Anxa2</b>                                    |
| 1443823_s_at | 98660               | Atp1a2                                          |
| 1440397_at   | 12293               | <b>Cacna2d1</b>                                 |
| 1451499_at   | 320405              | Cadps2                                          |
| 1418094_s_at | 12351               | <b>Car4</b>                                     |
| 1423286_at   | 12404               | Cbln1                                           |
| 1421195_at   | 12425               | Cckar                                           |
| 1423760_at   | 12505               | <b>Cd44</b>                                     |
| 1450288_at   | 12563               | <b>Cdh6</b>                                     |
| 1435190_at   | 12661               | <b>Chl1</b>                                     |
| 1457008_at   | 108015              | <b>Chrn4</b>                                    |
| 1441165_s_at | 64085               | <b>Clstn2</b>                                   |
| 1429210_at   | 237759              | Col23a1                                         |
| 1424131_at   | 12835               | Col6a3                                          |
| 1419017_at   | 53419               | <b>Corin</b>                                    |
| 1429413_at   | 70574               | <b>Cpm</b>                                      |
| 1453009_at   | 65969               | Cubn                                            |
| 1426990_at   | 13405               | <b>Dmd</b>                                      |
| 1452270_s_at | 13599               | <b>Ecel1</b>                                    |
| 1417307_at   | 13617               | Ednra                                           |
| 1448665_at   | 13649               | <b>Egfr</b>                                     |
| 1422586_at   | 140580              | <b>Elmo1</b>                                    |
| 1433525_at   | 18606               | <b>Enpp2</b>                                    |
| 1424932_at   | 18606               | F2r1                                            |
| 1446610_at   | 14063               | Fcgrt                                           |
| 1415894_at   | 14132               | <b>Folr1</b>                                    |
| 1448136_at   | 14275               | <b>Folr2</b>                                    |
| 1448931_at   | 14276               | <b>Ghr</b>                                      |
| 1416978_at   | 14600               | Gpr120                                          |
| 1450995_at   | 14600               | <b>Gpr37</b>                                    |
| 1451648_a_at | 107221              | <b>Gprc5c</b>                                   |
| 1417962_s_at | 14763               | <b>Hcrtr1 /// LOC100046129 /// LOC100048817</b> |
| 1460675_at   | 140559              | <b>Igsf8</b>                                    |

|              |                     |                        |
|--------------|---------------------|------------------------|
| 1451501_a_at | 70355               | <b>Il1rap</b>          |
| 1450875_at   | 16180               | Irs1                   |
| 1452947_at   | 16180               | Itga3                  |
| 1421844_at   | 16367               | Itgb5                  |
| 1421997_s_at | 16419               | Kcnj10                 |
| 1455158_at   | 16419               | Kcnq5                  |
| 1417534_at   | 16513               | <b>Kctd4</b>           |
| 1457587_at   | 17311               | <b>Kitl</b>            |
| 1420537_at   | 17311               | Lama2                  |
| 1441801_at   | 17311               | Lifr                   |
| 1426152_a_at | 16880               | LOC100047693 /// Pvr13 |
| 1426285_at   | 100047693 /// 58998 | <b>Lpl</b>             |
| 1454984_at   | 100047693 /// 58998 | Lsr                    |
| 1421132_at   | 16956               | Myo16                  |
| 1421133_at   | 16956               | <b>Ncam2</b>           |
| 1423331_a_at | 54135               | Negr1                  |
| 1415904_at   | 244281              | <b>Notch2</b>          |
| 1451255_at   | 320840              | <b>Nrcam</b>           |
| 1445532_at   | 18129               | <b>Nrp1</b>            |
| 1455556_at   | 18186               | Nrp2                   |
| 1434709_at   | 18186               | Odz3                   |
| 1418084_at   | 18187               | P2rx6                  |
| 1448943_at   | 18187               | Pcdh8                  |
| 1448944_at   | 23965               | Pdk1                   |
| 1429178_at   | 228026              | Pkp2                   |
| 1456925_at   | 228026              | <b>Plxdc2</b>          |
| 1435836_at   | 67448               | <b>Pvr13</b>           |
| 1449799_s_at | 67448               | <b>Pygl</b>            |
| 1418912_at   | 58998               | Rab15                  |
| 1449270_at   | 110095              | <b>Ralgps2</b>         |
| 1448673_at   | 78255               | <b>Rgnef</b>           |
| 1417230_at   | 110596              | Scn11a                 |
| 1428789_at   | 110596              | Sgms1                  |
| 1419457_at   | 24046               | Sirpa                  |
| 1419458_at   | 208449              | <b>Slc1a3</b>          |
| 1420784_at   | 19261               | <b>Slc24a3</b>         |
| 1436499_at   | 20512               | Slc4a4                 |
| 1436869_at   | 20512               | Slc6a15                |
| 1416985_at   | 94249               | <b>Steap2</b>          |
| 1424308_at   | 74051               | <b>Sv2b</b>            |
| 1426712_at   | 74051               | Synpo                  |
| 1428636_at   | 64176               | Syt12                  |
| 1444290_at   | 104027              | Thbd                   |
| 1434800_at   | 171180              | <b>Tm4sf1</b>          |

|            |       |               |
|------------|-------|---------------|
| 1435687_at | 21809 | <b>Tmem47</b> |
| 1422878_at | 17112 | <b>Vldlr</b>  |

Table S2. PCR primers sequence

| GENE  | FORWARD                      | REVERSE                     |
|-------|------------------------------|-----------------------------|
| GAPDH | 5-atgacatcaagaaggtggtg'-3'   | 5'-cataccaggaaatgagcttg-3'  |
| FoIR1 | 5- gaggctcagacaaggattgc-3'   | 5'-gtgggtgtggggaagtagaa-3'  |
| Lmx1a | 5'-gagaccacctgcttctaccg-3'   | 5'-gcccgcataacaaactcatt-3'  |
| TH    | 5'-gagtacaccgccgaggagattg-3' | 5-gcggatatactgggtgcactgg-3' |

Legends for supplemental figures and table.

**Fig S1 Gene expression profiling for ventral midbrain surface markers**

A, Isolation of floor plate and ventrolateral tissue from E10.5 mouse midbrain; B, RNA microarray analysis for identifying genes preferentially expressed in the floorplate; C, identify genes coding for plasma membrane protein according to gene ontology database, D, Image database search to validate midbrain expression; E, Selection of the genes with best expression patterns and commercially available antibodies for immunohistochemical validation on E10.5 mouse midbrain sections.

**Fig S2 Expression of FoIR1 in hESC-derived mesDA cells**

A, Day 20 culture double stained for mesDA neural progenitor marker LMX1A and DMRT5; B, day 30 culture stained for TH and FOXA2; C, RT-PCR analysis of day 20 and day 30 hESC differentiation cultures following mesDA and cortical differentiation protocols, respectively.

**Fig S3 Immunostaining of FoIR1+ and FoIR1- cells after magnetic sorting**

Day 13 cultures were processed for MACs using 1/200 antibody dilution and were cultured for a further 1 and 7 days, respectively. A, 1 day post-sort cultures stained for midbrain markers; B, 7 day post-sort cultures immunostained for markers for Astrocytes (GFAP) and markers for other neuronal neurotransmitter type (GABA, 5HT and TH).

**Table S1: Membrane proteins preferentially expressed in E10.5 floor plate**

Gene ontology analysis generated a list of membrane coding genes preferentially expressed in the floor plate of E10.5 mouse midbrain brains. Raw data obtained by microarray using the Affymetrix.GeneChip.Mouse430-2. The genes which midbrain expression is confirmed by image data search are labelled in bold.
